1 **Whole-mouse *in vivo* bioluminescence imaging applied to drug screening against**  
2 ***Leishmania infantum*: a reliable method to evaluate efficacy and optimize**  
3 **treatment regimens**

4 David M. Costa<sup>1,2</sup>, Pedro Cecílio<sup>1,2</sup>, Nuno Santarém<sup>1,2</sup>, Anabela Cordeiro-da-Silva<sup>1,2,3\*</sup>  
5 and Joana Tavares<sup>1,2\*</sup>

6 <sup>1</sup> Instituto de Investigação e Inovação em Saúde, Universidade do Porto, Porto,  
7 Portugal;

8 <sup>2</sup> Instituto de Biologia Molecular e Celular, Parasite Disease Group, Universidade do  
9 Porto, Porto, Portugal;

10 <sup>3</sup> Departamento de Ciências Biológicas, Faculdade de Farmácia da Universidade do  
11 Porto, Porto, Portugal;

12

13 \*Corresponding authors: Joana Tavares ([jtavares@ibmc.up.pt](mailto:jtavares@ibmc.up.pt)) and Anabela Cordeiro-  
14 da-Silva ([cordeiro@ibmc.up.pt](mailto:cordeiro@ibmc.up.pt));

15

16 Running title: *In vivo* imaging applied to anti-*Leishmania* drug discovery

17 Keywords: Live imaging; leishmaniasis; drug screening;

18

19 **ABSTRACT**

20 Leishmaniasis is an important vector-borne neglected tropical disease caused by  
21 *Leishmania* parasites. Current anti-*Leishmania* chemotherapy is unsatisfactory,  
22 justifying the continued search for alternative treatment options. Herein, we propose the  
23 use of a minimally invasive bioluminescence-based murine model for preliminary *in*  
24 *vivo* screening of compounds against visceral infection by *Leishmania infantum*. We  
25 demonstrate that luciferase-expressing axenic amastigotes, unlike promastigotes, are  
26 highly infectious to BALB/c mice and generate a robust bioluminescent signal in the  
27 main target organs, such as the liver and spleen. Finally, we validate the use of this  
28 technique to evaluate *in vivo* treatment efficacy using reference drugs amphotericin B  
29 and miltefosine.

30 **MAIN TEXT**

31 Leishmaniasis is a vector-borne parasitic disease caused by over 20 *Leishmania* species  
32 (1). It affects approximately 12 million people worldwide, with up to 1 million new  
33 cases every year (1). Visceral leishmaniasis (VL), the most severe form of the disease,  
34 is fatal if left untreated. VL is mainly associated with *Leishmania infantum* or  
35 *Leishmania donovani* infections, as these parasites are capable to disseminate to the host  
36 internal organs, particularly, the liver, spleen and bone marrow (1, 2). As there is still no  
37 vaccine available for humans, disease control relies mostly on chemotherapy and vector  
38 control. However, the limited and unsatisfactory chemotherapeutic options dictate the  
39 need of new drugs (3, 4). Indeed, every year up to 30 000 individuals suffering from VL  
40 die, some of them due to treatment failure (1, 5). Fortunately, neglected tropical  
41 diseases such as leishmaniasis have become a relevant part of the global health agenda,  
42 with a consequent increase in investment on control strategies (6). New leads against  
43 leishmaniasis are currently being optimized, while other compounds are already in pre-  
44 clinical and clinical stages (7, 8). Moreover, the recent development of *in vitro* high-  
45 throughput screening programs will undoubtedly feed the anti-*Leishmania* drug  
46 discovery pipeline with new compounds (8-10), whose efficacy remains to be addressed  
47 *in vivo*. Direct parasite observation remains the gold standard readout of anti-  
48 *Leishmania* drug *in vivo* efficacy (11). However, the traditional parasitological methods  
49 used to this end (microscopic observation of organ biopsies or limiting dilution assays)  
50 exhibit some limitations. Besides being labor-intensive and time-consuming, these  
51 methods only allow a static evaluation of infection since target organ collection entails  
52 euthanasia of the animal (8, 11). This is neither compatible with large scale-screening  
53 approaches nor ethically adequate, considering the requirement of a large number of  
54 animals (8). Thus, *in vivo* imaging techniques, namely those using bioluminescence-

55 based models, have been developed to overcome such limitations. Nonetheless, these  
56 have either been mainly focused on cutaneous disease (8, 12) or require more than a  
57 month post-infection to warrant a readout (12-15). Here we show and validate a fast,  
58 non-invasive, bioluminescence-based mouse model of visceral infection by *L. infantum*  
59 suitable for an initial compound screening approach.

60 In a previous study, we demonstrated that luciferase-expressing *L. infantum* axenic  
61 amastigotes (16) injected intravenously generate a robust bioluminescent signal in mice  
62 (17). To assess if this signal could still be detected at later time points post-infection,  
63 thus allowing the assessment of treatment efficacy *in vivo*, we infected 6- to 7-week-old  
64 BALB/c mice with  $10^8$  *L. infantum* axenic amastigotes by the intravenous (IV) route  
65 (Fig. 1A; C-D). Mice were then imaged 14 days post-infection (Fig. 1A) using an IVIS  
66 Lumina LT (PerkinElmer), 10 minutes after the subcutaneous administration of 2.4 mg  
67 of luciferin. The ventral fur was shaved to enable the maximization of detectable  
68 photons and the mice placed in dorsal position were angled to increase the detection of  
69 the signal coming from the spleen. Expectedly, the distribution of the bioluminescent  
70 signal indicates parasite establishment in the anatomical regions encompassing target  
71 organs such as the liver, spleen, lymph nodes and bone marrow (Fig. 1A). Interestingly,  
72 mice infected IV with the same inoculum of *L. infantum* promastigotes exhibited almost  
73 no detectable bioluminescent signal (Fig. 1B). Using the Living Image software, which  
74 can superimpose the bioluminescent signal of parasites and the grey-scale photograph of  
75 mice, elliptical regions (ROIs) were drawn to quantify bioluminescent signal in the  
76 anatomical regions of the liver, spleen, lymph nodes and bone marrow (the last two  
77 inferred from the signal of the left leg; Fig. 1A-B). At day 14 post-infection, the  
78 bioluminescent signal evaluated by the average radiance (photons/second/cm<sup>2</sup>/steradian)  
79 of the above ROIs was significantly higher in the animals infected with axenic

80 amastigotes than in animals infected with promastigotes (Fig 1C). Indeed, the signal in  
81 the spleen and leg of the animals infected with promastigotes was below the detection  
82 limit (Fig. 1C). To evaluate whether the differences in the bioluminescent signal  
83 detected in amastigote- and promastigote-infected mice were due to distinct infective  
84 capacities, parasite burden in the liver, spleen and bone marrow was evaluated using the  
85 gold standard limiting dilution assay (18). In fact, promastigote infection originated  
86 significantly lower parasite burdens in the liver, spleen and bone marrow when  
87 compared to axenic amastigote infection (Fig. 1D). This indicates that the difference in  
88 the signal intensity was most likely due to a reduced number of parasites in these  
89 organs. Since animals infected with axenic amastigotes yielded an early and sustained  
90 detectable bioluminescent signal in the main target organs, we used this model in a  
91 proof of concept experiment to validate it as a whole-animal imaging system to study  
92 the effectiveness of *in vivo* treatments against *L. infantum*. Consequently, infected  
93 animals were treated with miltefosine at 20 mg/kg/day (per os) or amphotericin B at 1  
94 mg/kg/day (IV) for 4 days starting from day 15 post-infection (Fig. 2A). Imaging was  
95 performed right before treatment (day 15 post-infection), and one (day 19 post-  
96 infection) and three days (day 21 post-infection) after the last day of treatment (Fig.  
97 2B). On day 21 post-infection mice were sacrificed and the liver, spleen and bone  
98 marrow were harvested for parasite burden assessment by limiting dilution. As  
99 anticipated, the short miltefosine treatment was sufficient to significantly decrease the  
100 bioluminescent signal in the ROIs defined for the liver and spleen (Fig. 2C).  
101 Amphotericin B was not as effective, although a statistically significant difference was  
102 still obtained in the spleen when compared to the untreated animals. Similar results  
103 were observed when the parasite burden was determined by the limiting dilution method  
104 (Fig. 2D). However, parasites were still detected in animals whose bioluminescent

105 signal was bellow background levels (Fig. 2D). Therefore, despite lower sensitiveness,  
106 whole-animal bioluminescence imaging enabled the determination of the effectiveness  
107 of different treatments in reducing spleen and liver parasite burdens.

108 We further evaluated the correlation between the two techniques used to determine  
109 parasite burdens in the liver and the spleen (Fig. 3). Average radiance values superior  
110 to the 99% confidence interval of the mean (Graphpad Prism 6.0 version) of the signal  
111 emitted by uninfected animals were plotted against the respective number of parasites  
112 per gram of liver (Fig. 3C) or spleen (Fig. 3D). Statistical significance, which translates  
113 into a positive correlation (Graphpad Prism 6.0 version), was found for both the liver  
114 and spleen determinations, evidencing the validity of our *in vivo* model.

115 Using this model, spleen and liver parasite burdens remain stable during the first 4  
116 weeks of infection (data not shown), leaving open the possibility of testing longer  
117 treatment regimens. Conversely, liver burdens predictably decrease to background  
118 bioluminescent levels at 8 weeks post-infection, suggesting the host could be  
119 controlling the infection due to granuloma formation in this organ [data not shown;  
120 (19)]. In contrast, spleen parasite burdens remain constant up to at least week 14, as  
121 evaluated by either bioluminescence imaging or limiting dilution assay (data not  
122 shown).

123 In conclusion, we propose the use of this rapid bioluminescence model for a preliminary  
124 *in vivo* screening of compounds against *L. infantum*. This minimally invasive method  
125 not only allows the accurate assessment of treatment efficacy, but also enables the  
126 adjustment of treatment regimens in an initial simple approach without the need to  
127 sacrifice large numbers of animals or to wait several days for a reliable readout. We  
128 expect this method to be a useful addition to the tools available to assist in the search for  
129 novel drugs to treat VL.

130 **ACKNOWLEDGMENTS**

131 We thank Carla Oliveira from i3S for the support with the statistical analysis.

132 **FUNDING**

133 This work was supported by funds from the Fundação para a Ciência e Tecnologia  
134 (FCT)/Ministério da Educação e Ciência (MEC) co-funded by the European Regional  
135 Development Fund (FEDER) under the Partnership agreement PT2020, through the  
136 Research Unit No.4293. This work also received funds from project Norte-01-0145-  
137 FEDER-000012 - Structured program on bioengineered therapies for infectious diseases  
138 and tissue regeneration, supported by Norte Portugal Regional Operational Programme  
139 (NORTE 2020), under the PORTUGAL 2020 Partnership Agreement, through the  
140 FEDER. JT is an Investigator FCT funded by National funds through FCT and co-  
141 funded through European Social Fund within the Human Potential Operating  
142 Programme. DC and PC are funded by FCT through individual fellowships  
143 (SFRH/BD/123734/2016 and SFRH/BD/121252/2016, respectively).

144

145 **REFERENCES**

- 146 1. **WHO.** 2017. Leishmaniasis, Fact sheet No 375  
147 <http://www.who.int/mediacentre/factsheets/fs375/en/>. Accessed January 10,  
148 2018.
- 149 2. **Cecilio P, Perez-Cabezas B, Santarem N, Maciel J, Rodrigues V, Cordeiro**  
150 **da Silva A.** 2014. Deception and manipulation: the arms of leishmania, a  
151 successful parasite. *Front Immunol* **5**:480.
- 152 3. **Loureiro I, Faria J, Santarem N, Smith TK, Tavares J, Cordeiro-da-Silva**  
153 **A.** 2017. Potential drug targets in the pentose phosphate pathway of  
154 trypanosomatids. *Curr Med Chem* doi:10.2174/0929867325666171206094752.
- 155 4. **Ponte-Sucre A, Gamarro F, Dujardin JC, Barrett MP, Lopez-Velez R,**  
156 **Garcia-Hernandez R, Pountain AW, Mwenechanya R, Papadopoulou B.**  
157 2017. Drug resistance and treatment failure in leishmaniasis: A 21st century  
158 challenge. *PLoS Negl Trop Dis* **11**:e0006052.
- 159 5. **Moore EM, Lockwood DN.** 2010. Treatment of visceral leishmaniasis. *J Glob*  
160 *Infect Dis* **2**:151-158.
- 161 6. **Molyneux DH, Savioli L, Engels D.** 2017. Neglected tropical diseases:  
162 progress towards addressing the chronic pandemic. *Lancet* **389**:312-325.
- 163 7. **Field MC, Horn D, Fairlamb AH, Ferguson MA, Gray DW, Read KD, De**  
164 **Rycker M, Torrie LS, Wyatt PG, Wyllie S, Gilbert IH.** 2017. Anti-  
165 trypanosomatid drug discovery: an ongoing challenge and a continuing need.  
166 *Nat Rev Microbiol* **15**:217-231.



- 167 8. **Zulfiqar B, Shelper TB, Avery VM.** 2017. Leishmaniasis drug discovery:  
168 recent progress and challenges in assay development. *Drug Discov Today*  
169 **22**:1516-1531.
- 170 9. **Annang F, Perez-Moreno G, Garcia-Hernandez R, Cordon-Obras C,**  
171 **Martin J, Tormo JR, Rodriguez L, de Pedro N, Gomez-Perez V, Valente M,**  
172 **Reyes F, Genilloud O, Vicente F, Castanys S, Ruiz-Perez LM, Navarro M,**  
173 **Gamarro F, Gonzalez-Pacanowska D.** 2015. High-throughput screening  
174 platform for natural product-based drug discovery against 3 neglected tropical  
175 diseases: human African trypanosomiasis, leishmaniasis, and Chagas disease. *J*  
176 *Biomol Screen* **20**:82-91.
- 177 10. **Pena I, Pilar Manzano M, Cantizani J, Kessler A, Alonso-Padilla J,**  
178 **Bardera AI, Alvarez E, Colmenarejo G, Cotillo I, Roquero I, de Dios-Anton**  
179 **F, Barroso V, Rodriguez A, Gray DW, Navarro M, Kumar V, Sherstnev A,**  
180 **Drewry DH, Brown JR, Fiandor JM, Julio Martin J.** 2015. New compound  
181 sets identified from high throughput phenotypic screening against three  
182 kinetoplastid parasites: an open resource. *Sci Rep* **5**:8771.
- 183 11. **Gupta S, Nishi.** 2011. Visceral leishmaniasis: experimental models for drug  
184 discovery. *Indian J Med Res* **133**:27-39.
- 185 12. **Avci P, Karimi M, Sadasivam M, Antunes-Melo WC, Carrasco E, Hamblin**  
186 **MR.** 2017. In-vivo monitoring of infectious diseases in living animals using  
187 bioluminescence imaging. *Virulence* doi:10.1080/21505594.2017.1371897:1-  
188 35.
- 189 13. **Melo GD, Goyard S, Lecoecur H, Rouault E, Pescher P, Fiette L, Boissonnas**  
190 **A, Minoprio P, Lang T.** 2017. New insights into experimental visceral

- 191 leishmaniasis: Real-time in vivo imaging of *Leishmania donovani* virulence.  
192 PLoS Negl Trop Dis **11**:e0005924.
- 193 14. **Michel G, Ferrua B, Lang T, Maddugoda MP, Munro P, Pomares C,**  
194 **Lemichez E, Marty P.** 2011. Luciferase-expressing *Leishmania infantum*  
195 allows the monitoring of amastigote population size, in vivo, ex vivo and in  
196 vitro. PLoS Negl Trop Dis **5**:e1323.
- 197 15. **Reimao JQ, Oliveira JC, Trinconi CT, Cotrim PC, Coelho AC, Uliana SR.**  
198 2015. Generation of luciferase-expressing *Leishmania infantum chagasi* and  
199 assessment of miltefosine efficacy in infected hamsters through bioimaging.  
200 PLoS Negl Trop Dis **9**:e0003556.
- 201 16. **Sereno D, Roy G, Lemesre JL, Papadopoulou B, Ouellette M.** 2001. DNA  
202 transformation of *Leishmania infantum* axenic amastigotes and their use in drug  
203 screening. Antimicrob Agents Chemother **45**:1168-1173.
- 204 17. **Tavares J, Costa DM, Teixeira AR, Cordeiro-da-Silva A, Amino R.** 2017. In  
205 vivo imaging of pathogen homing to the host tissues. Methods **127**:37-44.
- 206 18. **Buffet PA, Sulahian A, Garin YJ, Nassar N, Derouin F.** 1995. Culture  
207 microtitration: a sensitive method for quantifying *Leishmania infantum* in  
208 tissues of infected mice. Antimicrob Agents Chemother **39**:2167-2168.
- 209 19. **Rodrigues V, Cordeiro-da-Silva A, Laforge M, Silvestre R, Estaquier J.**  
210 2016. Regulation of immunity during visceral *Leishmania* infection. Parasit  
211 Vectors **9**:118.

212

213

214 FIGURES AND LEGENDS

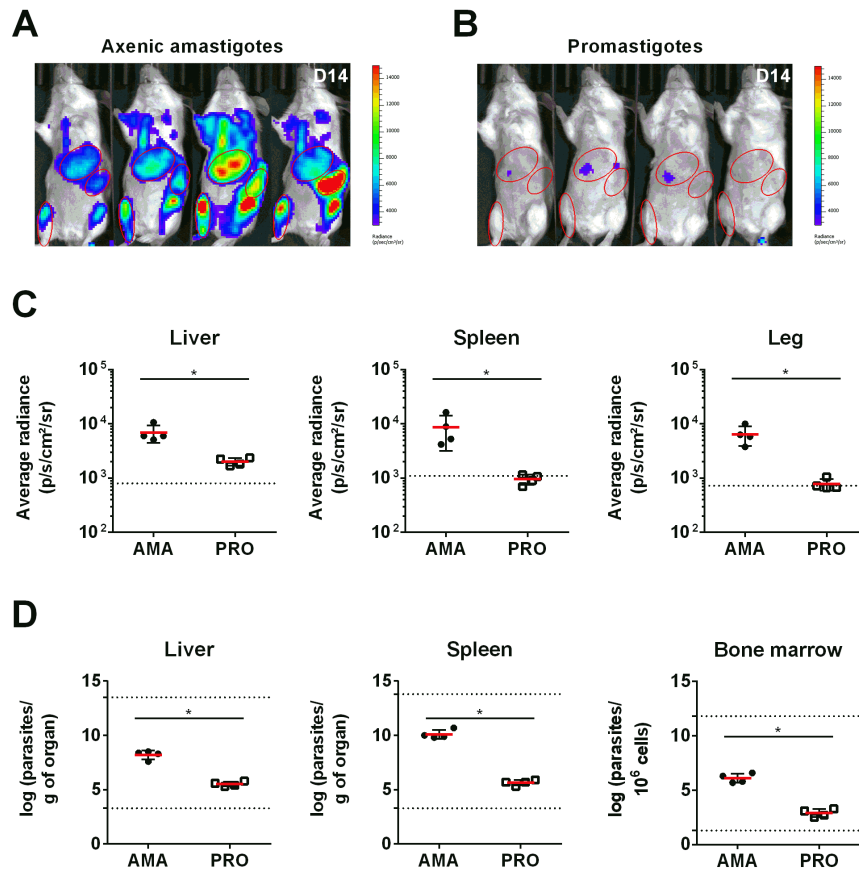

215

216 **FIG 1** Infectivity of luciferase-expressing *L. infantum* axenic amastigotes and

217 promastigotes via intravenous injection. (A, B) Images of BALB/c mice infected with

218 either luciferase-expressing *L. infantum* axenic amastigotes (A) or promastigotes (B)

219 resulting from the superimposition of the bioluminescence signal map and a grey-scale

220 photograph of the mice. The regions of interest (ROIs) shown were used to quantify the

221 bioluminescence signal originating from the liver, spleen, and right hind leg of the

222 mouse. (C) Bioluminescence measurements expressed as average radiance

223 (photons/s/cm<sup>2</sup>/steradian) corresponding to the previously defined liver (left), spleen

224 (center), and right hind leg (right) ROIs. Means ± standard deviations are represented in

225 bars. The dotted line represents the background signal calculated by applying the ROIs

226 on images of uninfected animals. (D) Parasite burden in the liver, spleen, and femur

227 bone marrow determined by limiting dilution 14 days post-infection. Means  $\pm$  standard  
228 deviations are represented in bars. The dotted lines represent the upper and lower  
229 detection limit of the technique for each organ. (C, D) AMA: animals infected with  $10^8$   
230 axenic amastigotes. PRO: animals infected with  $10^8$  promastigotes. Statistical  
231 significance calculated by Mann Whitney test using Graphpad Prism 6.0 version:  $p <$   
232 0.05 (\*). Data representative of two independent experiments.

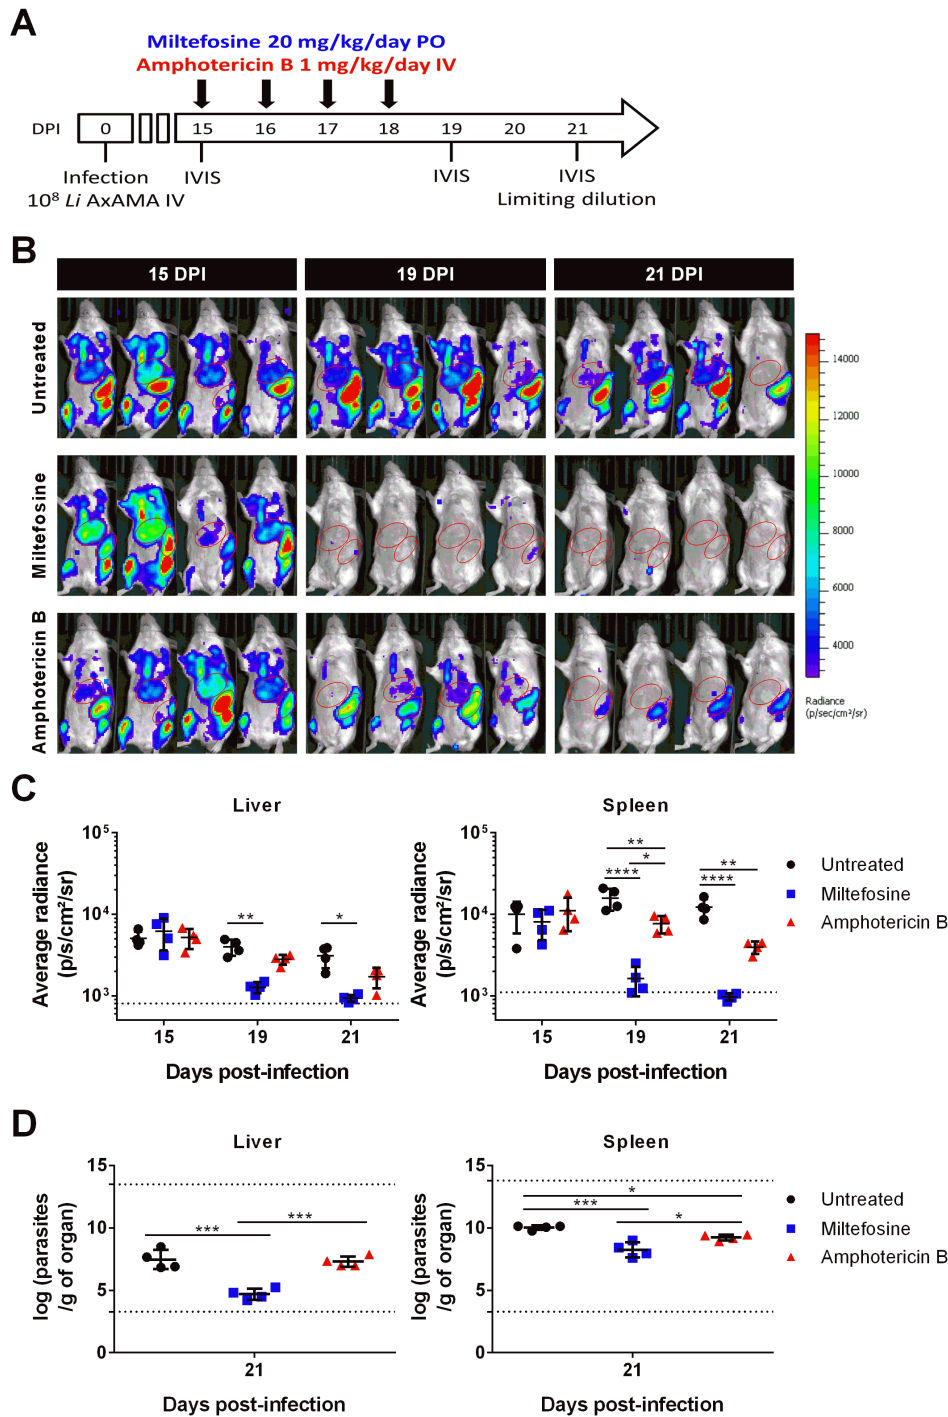

233

234 **FIG 2** Treatment of *L. infantum* axenic amastigote-infected mice with reference drugs  
 235 miltefosine and amphotericin B. (A) Schematic representation of the experimental  
 236 design. BALB/c mice were infected with  $10^8$  luciferase-expressing *L. infantum* axenic  
 237 amastigotes (AMA) IV and 4-day treatments with either 20 mg/kg/day of miltefosine  
 238 *per os* (PO) or 1 mg/kg/day of Amphotericin B IV were initiated 15 days post-infection

239 (DPI). All animals (n = 4 per group) were imaged right before (day 15 post-infection),  
240 one day after (day 19 post-infection) and 3 days (day 21 post-infection) after the end of  
241 treatment using the IVIS Lumina LT system. At the last time point animals were  
242 sacrificed and parasite burden in the liver, spleen, and femur bone marrow were  
243 determined by limiting dilution. (B) Images of infected mice resulting from the  
244 superimposition of the bioluminescence signal map and a grey-scale photograph of the  
245 mice. The ROIs shown were used to quantify the bioluminescence signal originating  
246 from the liver and spleen anatomical regions. (C) Bioluminescence measurements  
247 expressed as average radiance (photons/s/cm<sup>2</sup>/steradian) corresponding to the previously  
248 defined liver (graph on the left) and spleen (graph on the right) ROIs. Means ± standard  
249 deviations are represented in bars. The dotted line represents the background signal  
250 calculated by applying the ROIs on images of uninfected animals. Statistical  
251 significance calculated by two-way ANOVA using Graphpad Prism 6.0 version:  $p <$   
252  $0.05$  (\*),  $p < 0.005$  (\*\*),  $p < 0.0001$  (\*\*\*\*). (D) Parasite burdens in the liver (graph on  
253 the left) and spleen (graph on the right) determined by limiting dilution 21 days post-  
254 infection. The dotted lines represent the upper and lower detection limit of the technique  
255 for each organ. Means ± standard deviations are represented in bars. Statistical  
256 significance calculated by ordinary one-way ANOVA using Graphpad Prism 6.0  
257 version:  $p < 0.05$  (\*),  $p < 0.0005$  (\*\*\*). Data representative of two independent  
258 experiments.

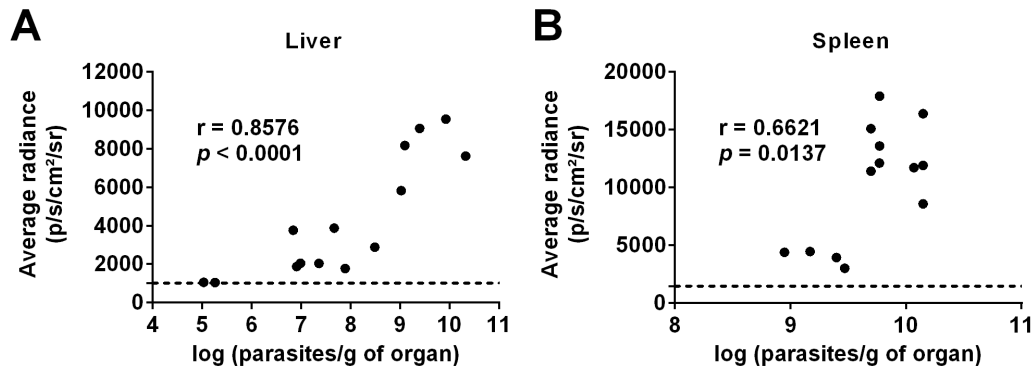

259

260 **FIG 3** Relation between bioluminescence signal and parasite burdens measured by  
261 limiting dilution. Average radiance (photons/s/cm<sup>2</sup>/steradian) from liver (A) or spleen  
262 (B) ROIs plotted against the matching parasite burden in the corresponding organ.  
263 Pooled data of individual mice and from two independent experiments is shown. The  
264 dashed line represents the upper limit of the 99% confidence interval of the mean  
265 average radiance values obtained for each ROI when applied on images of uninfected  
266 BALB/c mice (n = 6). Only animals displaying average radiance levels above the  
267 dashed line were considered for the calculation of the Pearson's correlation coefficients  
268 using Graphpad Prism 6.0 version.
